# Supplementary material for: Integrative Analysis Identifies TCIRG1 as a Potential Prognostic and Immunotherapy-Relevant Biomarker Associated with Malignant Cell Migration in Clear Cell Renal Cell Carcinoma
Source: MDPI journal article supplement (doi:10.3390/cancers14194583), 2022-09-21
Supplement: s1 [file s1]

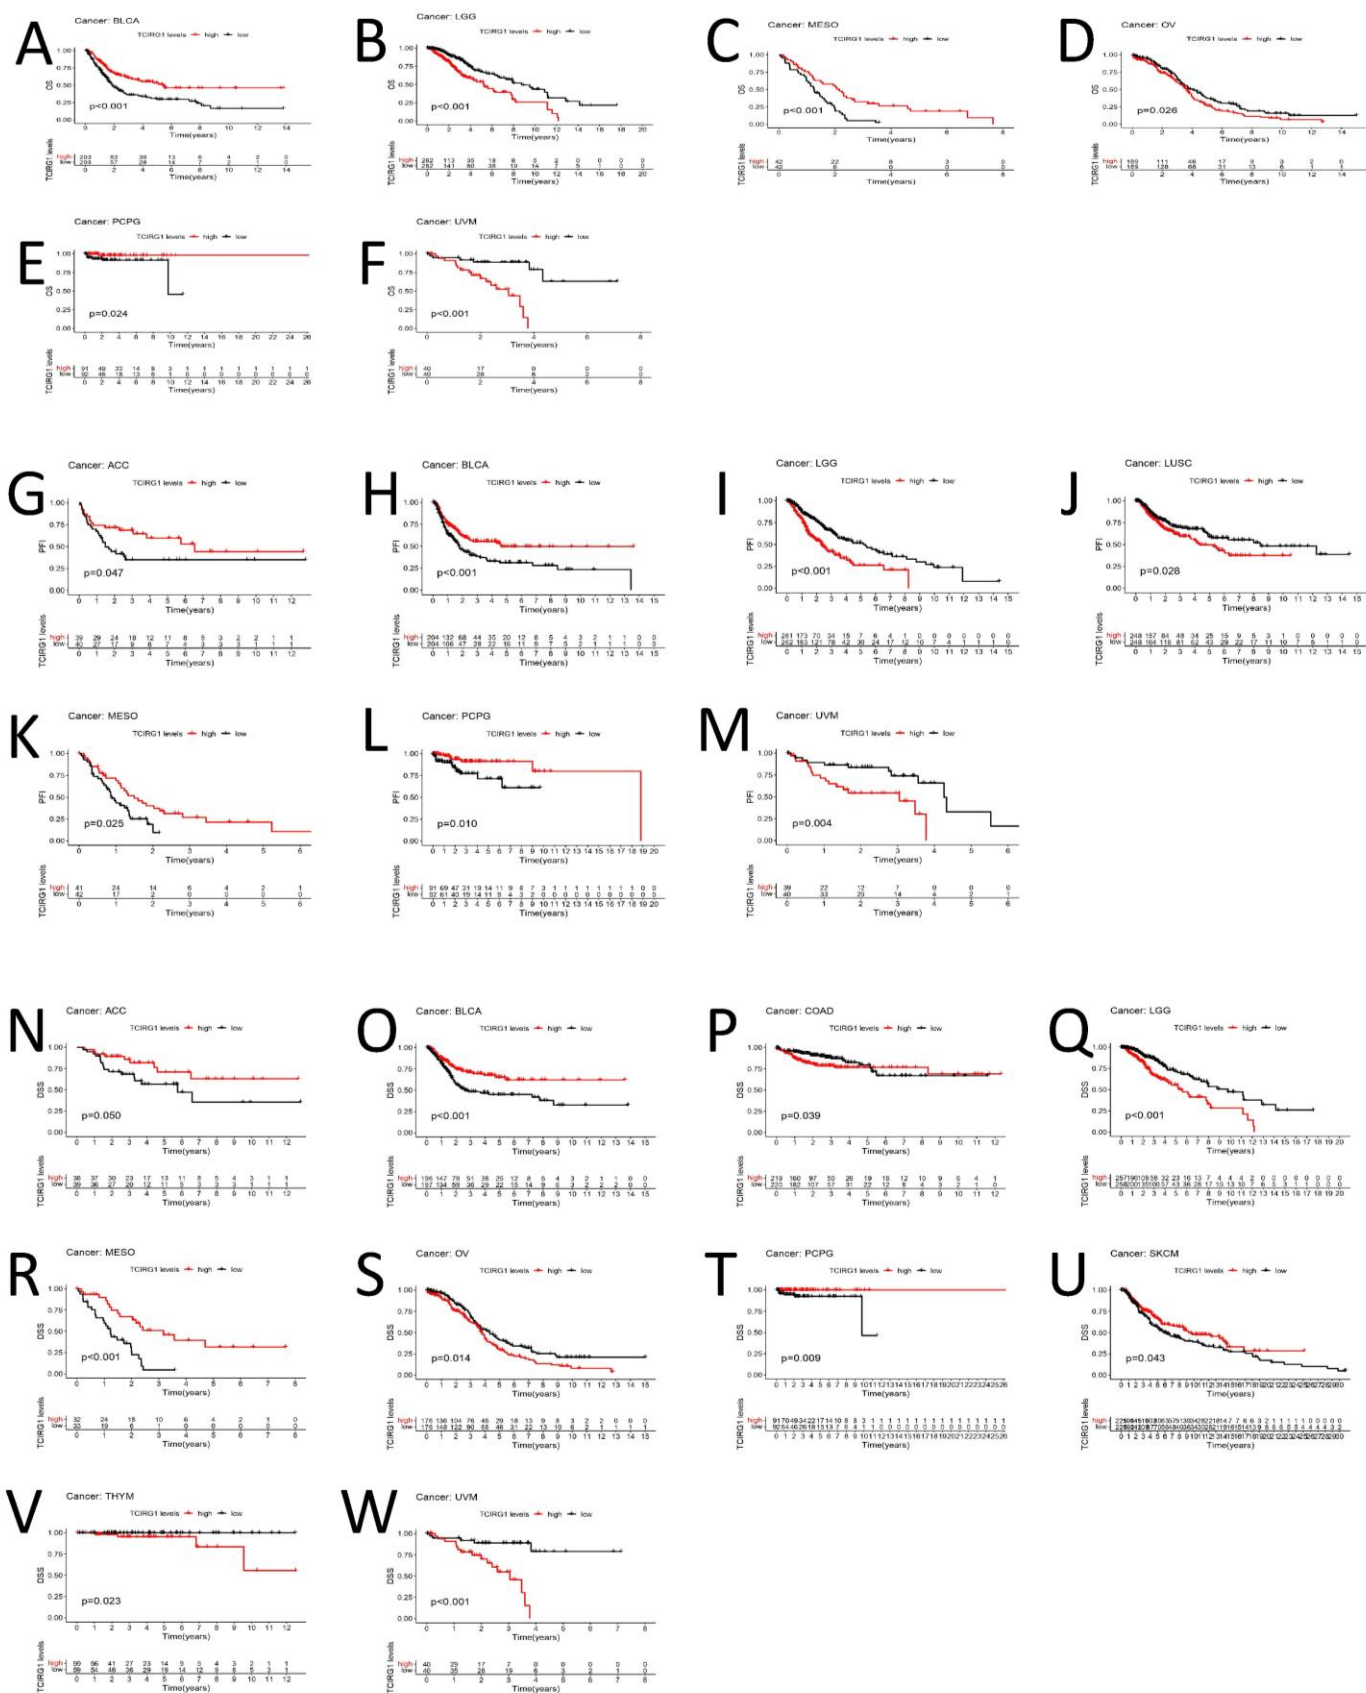

**Figure S1:** KM survival analysis of the association between TCIRG1 expression and OS (A–F), PF (G–M), and DSS (N–W).

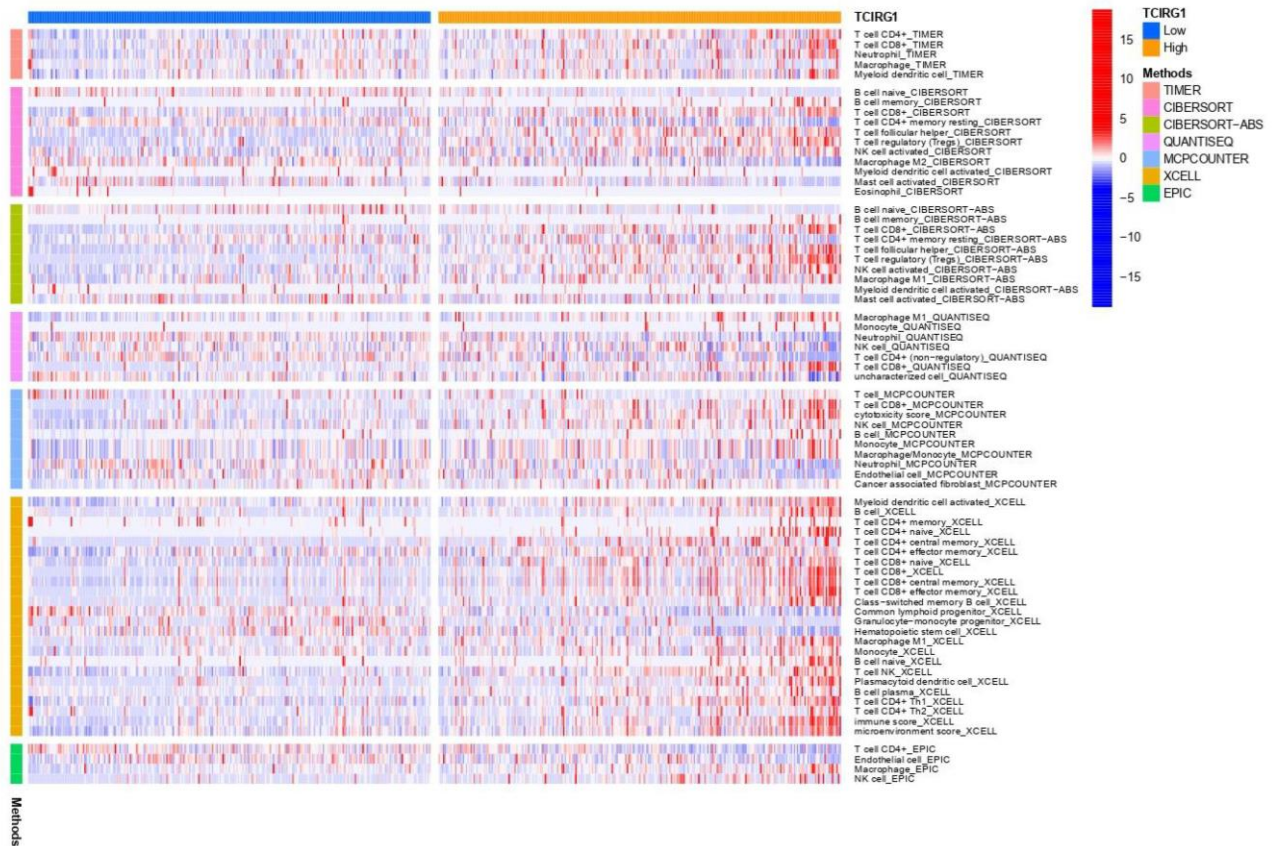

**Figure S2:** The relationship between TCIRG1 and immune cells in renal clear cell carcinoma tissue is revealed by several algorithms.

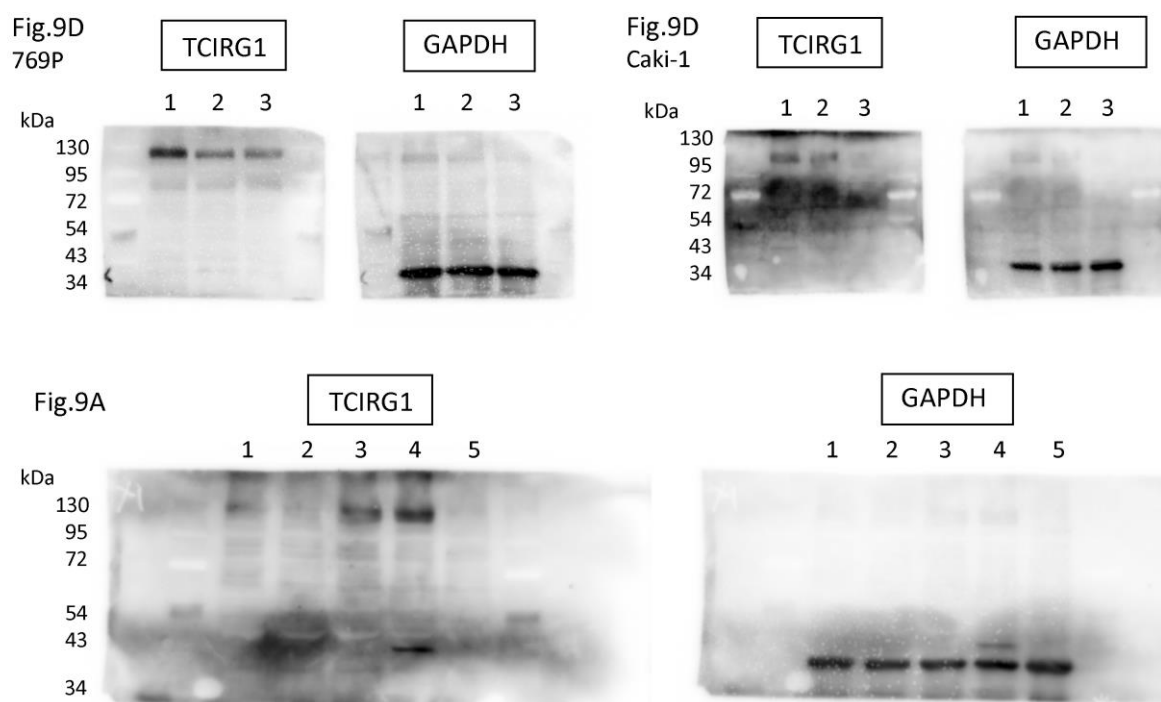

**Figure S3:** uncropped original western blots of Figure 9.
